# Supplementary material for: One-pot synthesis of highly active Ni/Fe nano-bimetal by simultaneous ball milling and in situ chemical deposition
Source: Royal Society of Chemistry journal article supplement (doi:10.1039/c8ra04426k), 2018-01-01
Supplement: c8ra04426k1.pdf [file c8ra04426k1.pdf]

1  
2  
3  
4  
5  
6  
7  
8  
9  
10  
11  
12  
13  
14  
15  
16  
17  
18  
19

## Supplementary Material

### **One-pot Synthesis of Highly Active Ni/Fe Nano-bimetal by Simultaneous Ball Milling and In-situ Chemical Deposition**

▪ Shuo-Shuo Zhang <sup>a, †</sup>, Ning Yang <sup>a, †</sup>, Shou-Qing Ni <sup>a, \*</sup>, Vinothkumar Natarajan <sup>b</sup>,  
Hafiz Adeel Ahmad <sup>a</sup>, Shiping Xu <sup>a</sup>, Xu Fang <sup>c</sup>, Jinhua Zhan <sup>b, \*</sup>

▪ <sup>a</sup> *Shandong Provincial Key Laboratory of Water Pollution Control and Resource Reuse, School of Environmental Science and Engineering, Shandong University, No. 27 Shanda South Road, Jinan 250100 Shandong, PR China*

▪ <sup>b</sup> *Key Laboratory for Colloid & Interface Chemistry of Education Ministry, Department of Chemistry, Shandong University, Jinan 250100, PR China*

▪ <sup>c</sup> *State Key Laboratory of Microbial Technology, Shandong University, Jinan 250100, PR China*

▪ <sup>†</sup> Shuo-Shuo Zhang and Ning Yang contributed equally to this work and share the first authorship.

▪ \*Corresponding author : Shou-Qing Ni, E-mail: sqni@sdu.edu.cn. Phone and Fax numbers: + 86-531-88365660. Jinhua Zhan, E-mail: jhzhan@sdu.edu.cn. Phone and Fax number: + 86-531-88365017.

## Summary

20

21

22 **Text S1.** Materials

23 **Text S2.** Preparation of iron sponge and Ni/Fe bimetal prepared by chemical  
24 solution deposition (CSD) and ball milling (BM).

25 **Text S3.** Characterization of Ni/Fe bimetal

26 **Fig. S1.** Relationship between  $\ln(C/C_0)$  and time as a function of milling time (Ni  
27 content = 25 wt %) on the dechlorination of 4-CP.

28 **Fig. S2.** Effect of milling time on the X-ray diffraction peaks of the Ni/Fe materials.

29 **Fig. S3.** TEM image of Ni/Fe-B&C.

30 **Fig. S4.** EDS analysis of the Ni/Fe-B&C.

31 **Fig. S5.** Effect of Ni/Fe dosage on the  $k_{obs}$  and  $k_m$  in the dechlorination kinetics.

32 **Fig. S6.** Effect of 4-CP concentration on the  $k_{obs}$  and  $k_c$  in the dechlorination kinetics.

33 **Fig.S7.** (a) Concentration of dissolved Fe and Ni ion in solution and (b) the total  
34 loss and respective loss rate of Fe, Ni after 10-cycle dechlorination reaction at  
35 different initial pH. (Reaction condition: Ni/Fe dose = 1 g/10mL, 4-CP concentration  
36 = 20 mg/L, Ni content = 20 wt%, each reaction time = 30 min)

37

38

39 **Text S1. Materials**

40 Iron sponge (>98%) was obtained from Hanbang water purification material  
41 factory (Gongyi, Henan, China). Nickel (>99%) powder was obtained from Aladdin  
42 Reagent Co., Ltd. (Shanghai). Ethanol and HPLC grade methanol was purchased from  
43 Fu Yu Fine Chemical Co., Ltd. (Tianjin, China). 4-CP (>99%) was procured from  
44 Lark Technology Co., Ltd. (Beijing, China). All the other reagents used in the  
45 experiments were purchased from Sinopharm Chemical Reagent Co., Ltd. (Shanghai,  
46 China). Methanol was GR grade while other chemicals used were AR grade.

47

48

49

50

51

52

53

54

55

56

57 **Text S2. Preparation of iron sponge and Ni/Fe bimetal prepared by chemical**

58 **solution deposition (CSD) and ball milling (BM).**

59 Pretreatment of iron sponge

60 3.0 g iron sponge briquette was charged into stainless steel (SS) milling pot (100  
61 mL) with several steel balls (90g, 6 mm size). Ball milling process was performed in a  
62 planetary ball mill (QM-3SP2, Nanjing University Instrument, China) consisting of  
63 four grinding jars at a rotation speed of 270 rpm and duration of 2 h with ambient air.  
64 The obtained black powder was stored in centrifugal tubes with N<sub>2</sub> for future use.

65 Ni/Fe bimetal prepared by CSD

66 5g iron sponge powder prepared before was added into 50 mL of H<sub>2</sub>SO<sub>4</sub> solution  
67 at pH 1.0 in a 100-mL flask and put it on a shaker at 220 rpm for 15 min. After this,  
68 the powder was washed with DI water (50 mL, pre-aerated by N<sub>2</sub> for 15 min) for three  
69 times. Finally, the powder treated by acid was mixed with 50 mL NiCl<sub>2</sub> ethanol  
70 solution (10 g Ni/L) and constantly shaken in a rotary shaker (220 rpm) at 25°C for 4  
71 h. Then, the obtained powder was separated and washed three times with  
72 deoxygenated DI water. The reaction occurs as follows;

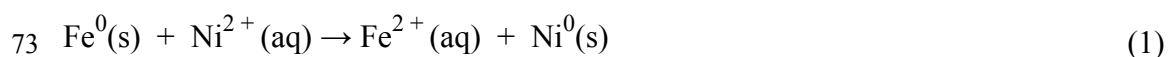

74 Ni/Fe bimetal prepared by BM

75 Different proportions of nickel powder and iron sponge powder have been  
76 poured into grinding jars with 30 g steel balls per 1 g mixture. By a planetary ball mill,  
77 mixed powders were milled at a rotation speed of 270 rpm without inert gas

78 protection for 2 h. The prepared powders were deposited in a centrifugal tube with N<sub>2</sub>.

79

80

81

82

83

84

85

86

87

88

89

90

91

92

93

94 **Text S3. Characterization of Ni/Fe bimetal**

95 The scanning electron microscopy (SEM, JSM-6700F, JEOL, Japan) and energy  
96 dispersive X-ray spectroscopy (EDS, INCA X- Sight, Oxford Instruments, UK) was  
97 used to characterize the morphology and surface elemental composition of the Ni/Fe  
98 bimetallic particles prepared by BM and B&C. X-ray diffraction (XRD) analysis was  
99 performed to examine the changes of crystal before and after B&C. The Ni/Fe bimetal  
100 particles were supported on a carbon-coated Cu-grid to carry out morphological  
101 studies using a transmission electron microscopy (TEM, JEM-1011, JEOL, Japan).  
102 The electrochemical measurement (cyclic voltammetry) was carried out in a  
103 conventional three-electrode cell using a CHI 660D electrochemical work station at  
104 room temperature.

105

106

107

108

109

110

111

112

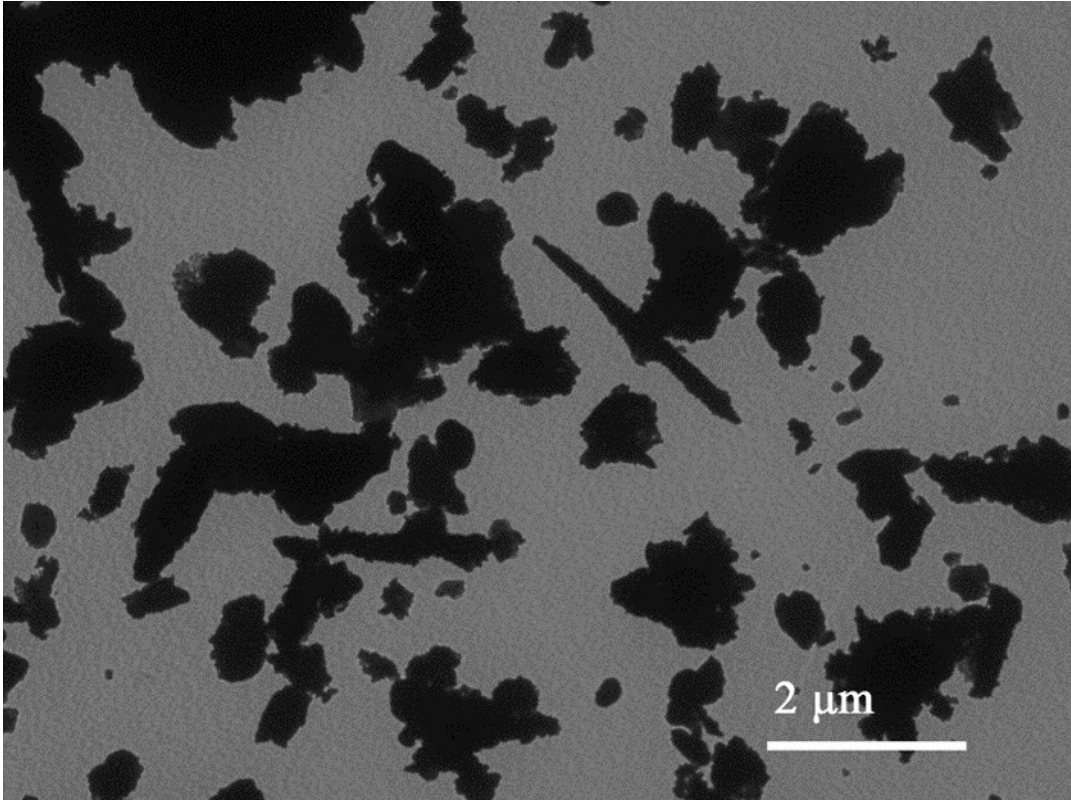

113

114 **Fig. S1.** TEM image of Ni/Fe-B&C.

115

116

117

118

119

120

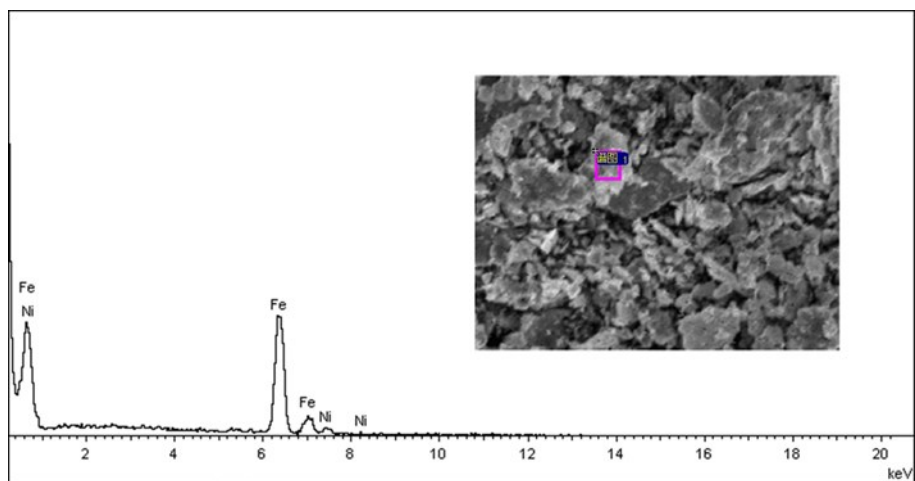

121 **Fig. S2.** EDS analysis of the Ni/Fe-B&C.

122

123

124

125

126



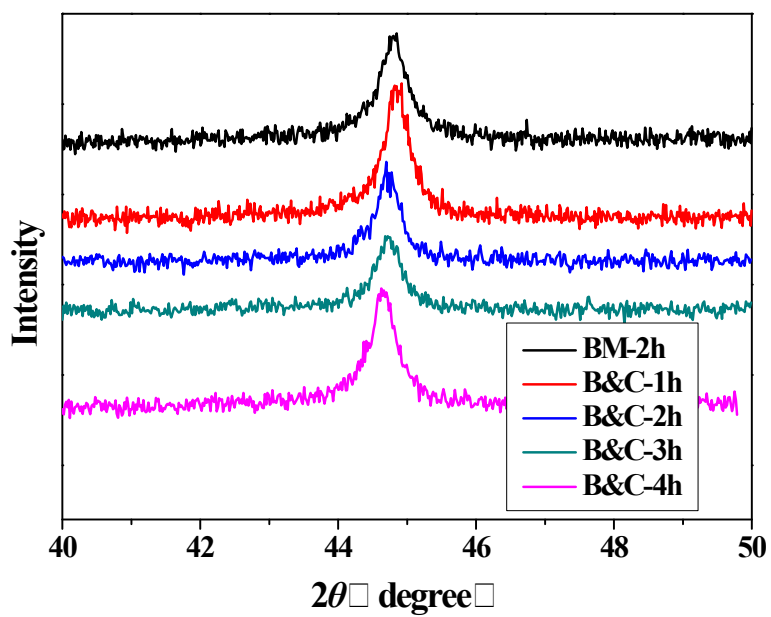

127

128 **Fig. S3.** Effect of milling time on the X-ray diffraction peaks of the Ni/Fe materials.

129

130

131

132

133

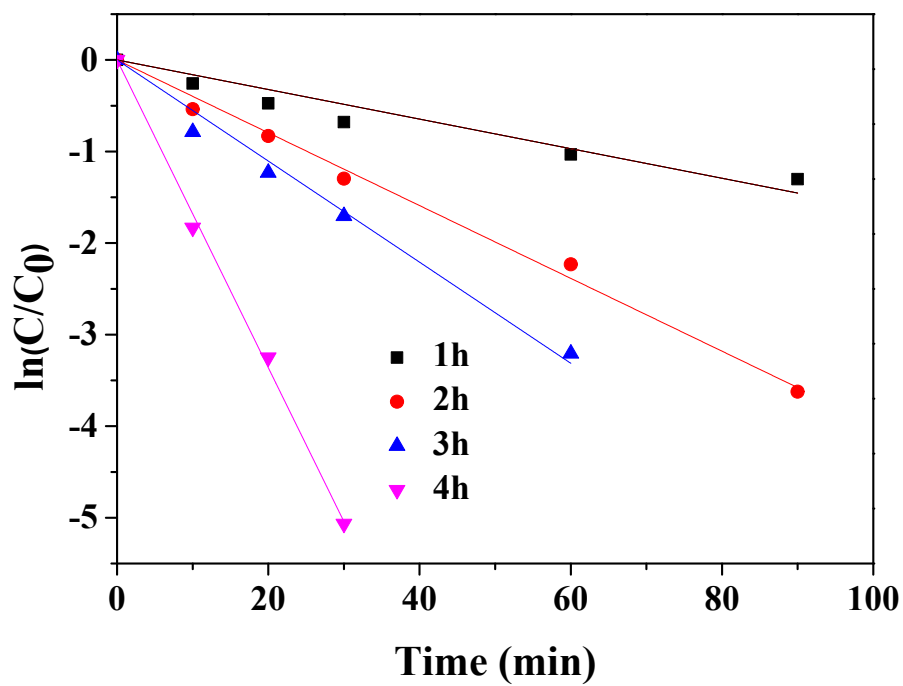

134

135 **Fig. S4.** Relationship between  $\ln(C/C_0)$  and time as a function of milling time (Ni

136 content = 25 wt %) on the dechlorination of 4-CP.

137

138

139

140

141

142

143

144

145

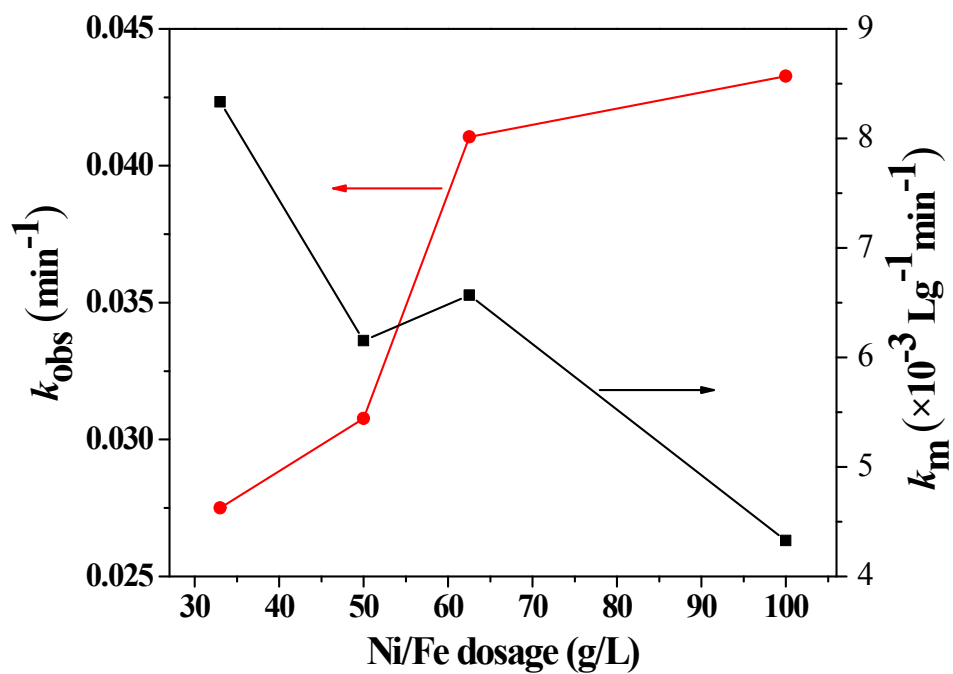

146

147 **Fig. S5.** Effect of Ni/Fe dosage on the  $k_{obs}$  and  $k_m$  in the dechlorination kinetics.

148

149

150

151

152

153

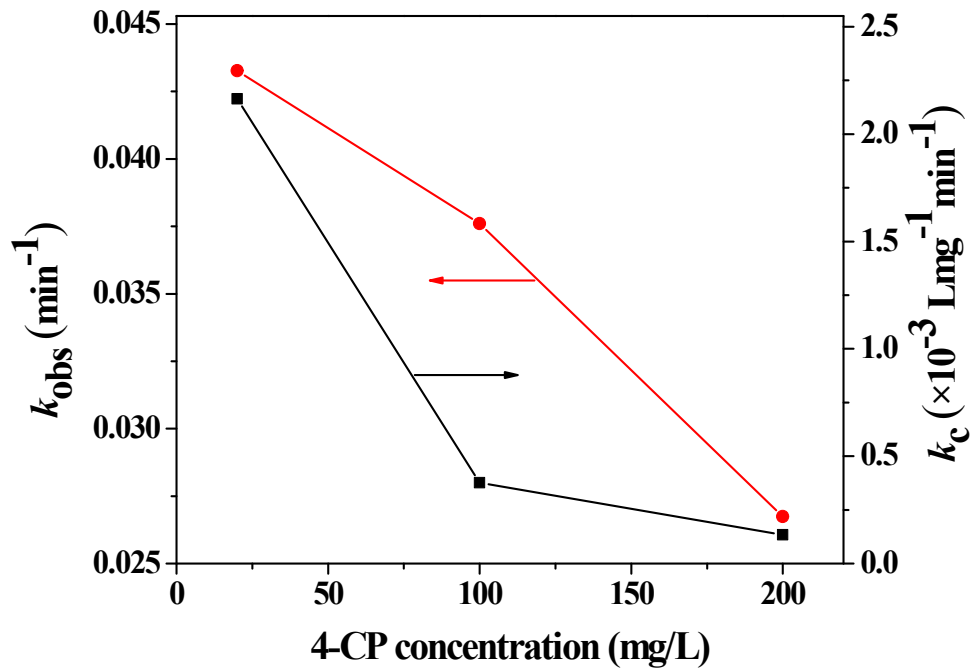

154

155 **Fig. S6.** Effect of 4-CP concentration on the  $k_{obs}$  and  $k_c$  in the dechlorination kinetics.

156

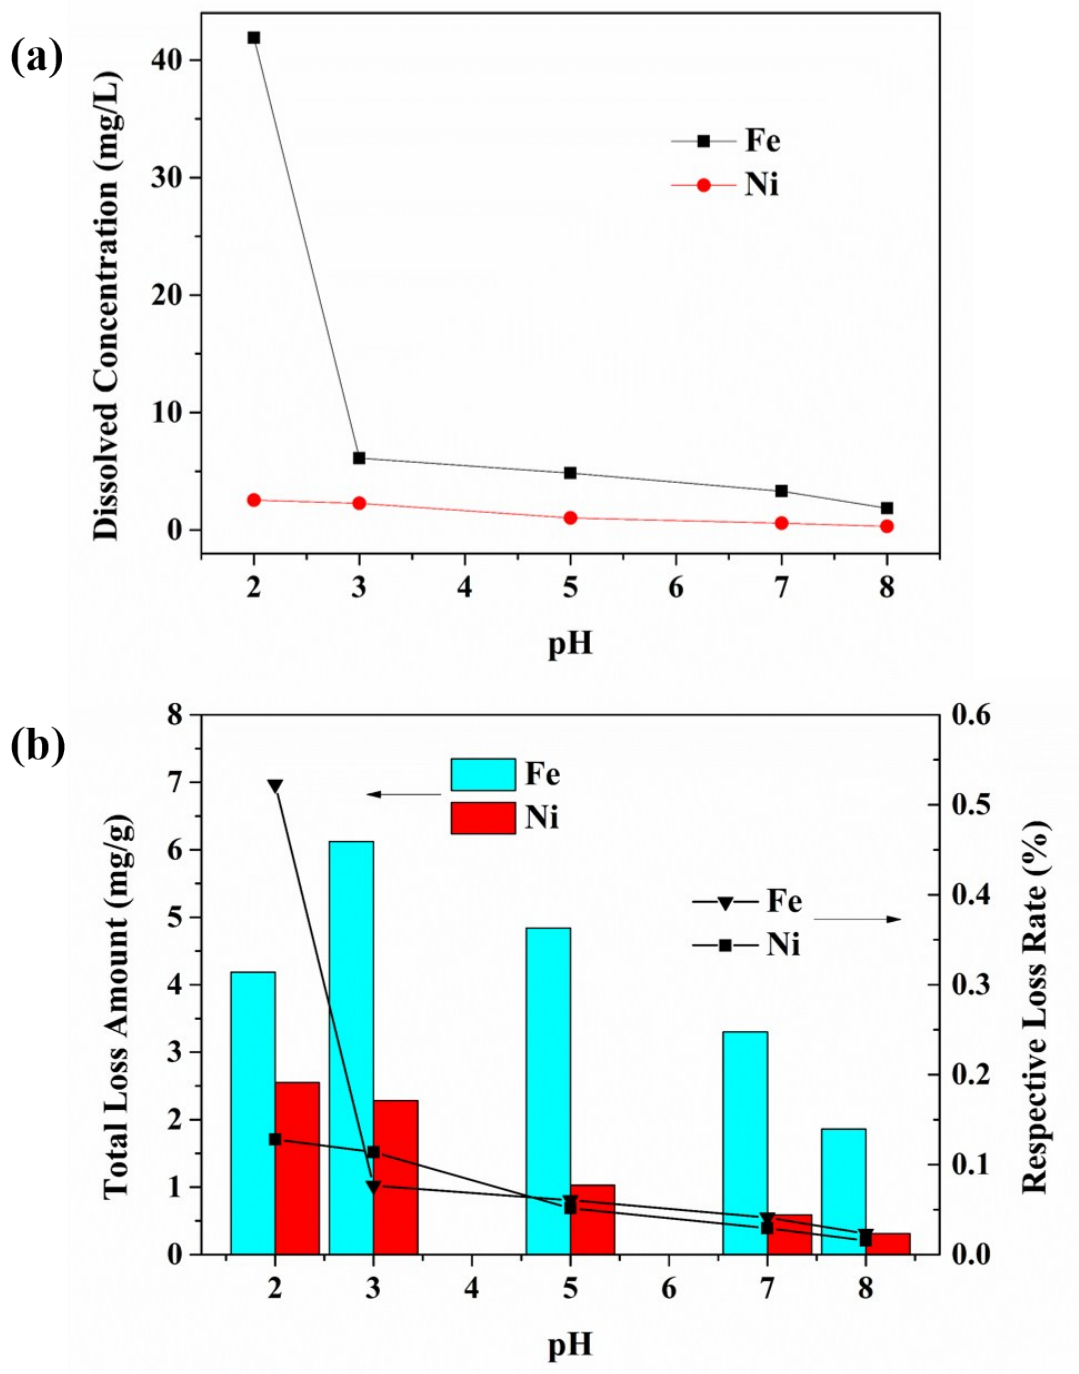

157

158 **Fig. S7.** (a) Concentration of dissolved Fe and Ni ion in solution and (b) the total loss  
 159 and respective loss rate of Fe, Ni after 10-cycle dechlorination reaction at different  
 160 initial pH. (Reaction condition: Ni/Fe dose = 1 g/10mL, 4-CP concentration = 20  
 161 mg/L, Ni content = 20 wt%, each reaction time = 30 min)
